# Supplementary material for: Treatment of nitrate-contaminated groundwater using microbially enhanced permeable reactive barrier technology
Source: Royal Society of Chemistry journal article supplement (doi:10.1039/d3ew00019b), 2023-01-01
Supplement: d3ew00019b1.pdf [file d3ew00019b1.pdf]

## Support Information

### **Research on the treatment of nitrate contaminated groundwater by microbially enhanced permeable reactive barrier technology**

Shengfeng Liu<sup>a,b</sup>, Bai Gao<sup>a,b,\*</sup>, Xingxing Xiong<sup>b</sup>, Nan Chen<sup>b,c\*</sup>, Keng Xuan<sup>a,b,\*</sup>, Wenjie Ma<sup>a,b</sup>, Yong Song<sup>d</sup>, Yanling Yu<sup>b</sup>

*<sup>a</sup> State Key Laboratory of Nuclear Resources and Environment, East China University of Technology, Nanchang, Jiangxi 330013, P. R. China*

*<sup>b</sup> School of Water Resources & Environmental Engineering, East China University of Technology, Nanchang, Jiangxi 330013, P. R. China*

*<sup>c</sup> School of Water Resources and Environment, China University of Geosciences (Beijing), Beijing, 100083, P. R. China*

*<sup>d</sup> Jiangxi Geological Bureau Non-ferrous Brigade, Ganzhou 341000, P. R. China*

*\*Corresponding author: School of Water Resources & Environmental Engineering, East China University of Technology, 418 Guanglan Road, Nanchang, 330013, China.*

*E-mail: [gaobai@ecit.cn](mailto:gaobai@ecit.cn)*

*E-mail: [chennan@cugb.edu.cn](mailto:chennan@cugb.edu.cn)*

*E-mail: [xuankeng@ecut.edu.cn](mailto:xuankeng@ecut.edu.cn)*

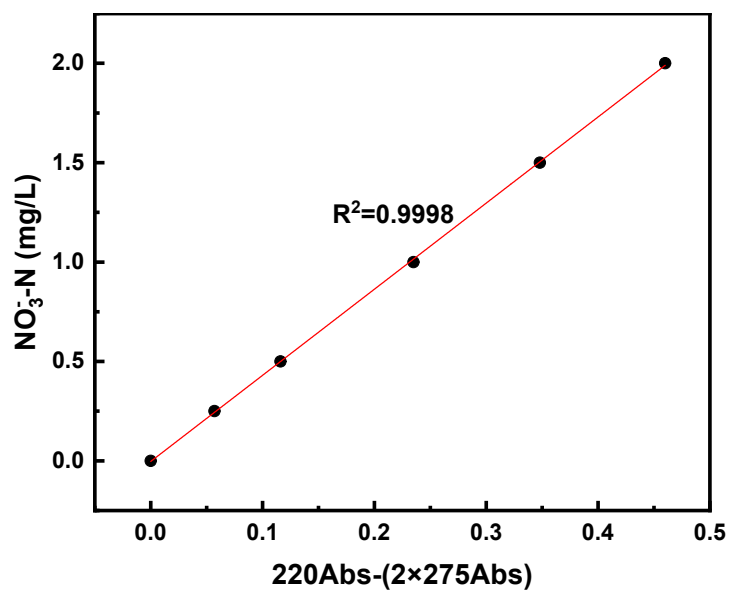

Fig.S1. UV-Vis spectrophotometer NO<sub>3</sub><sup>-</sup>-N standard curve

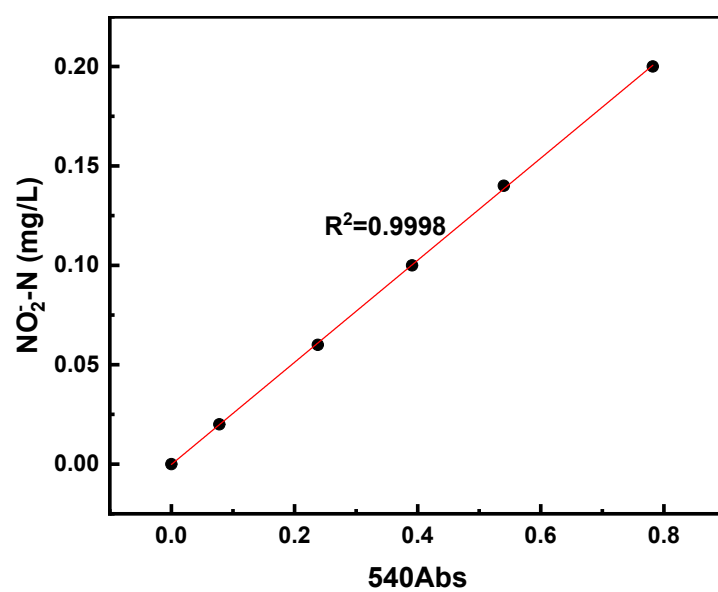

Fig.S2. UV-Vis spectrophotometer NO<sub>2</sub><sup>-</sup>-N standard curve

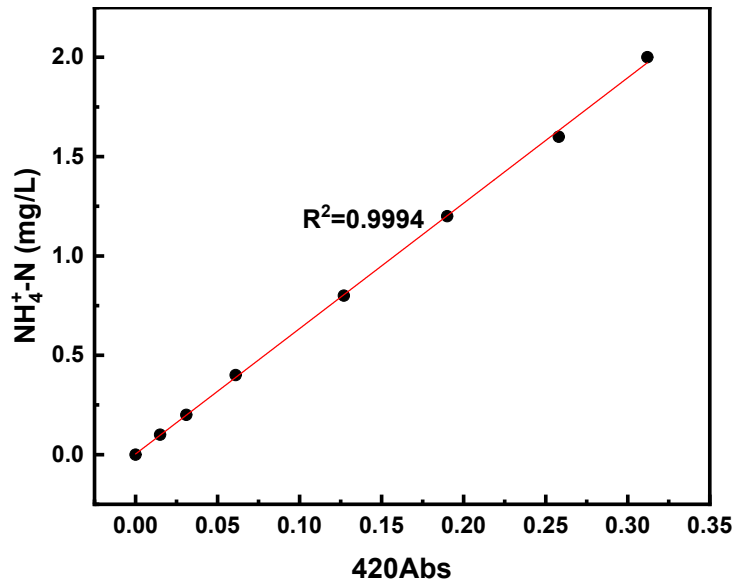

Fig.S3.UV-Vis spectrophotometer NH<sub>4</sub><sup>+</sup>-N standard curve

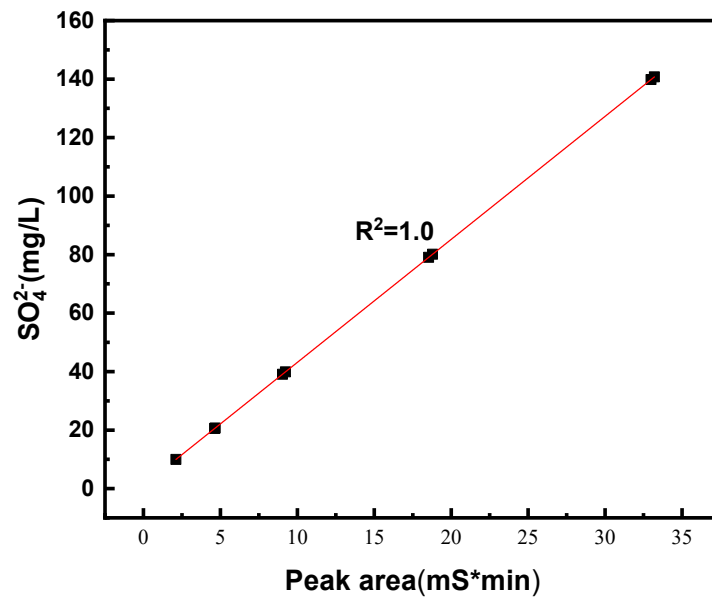

Fig.S4.Ion chromatograph SO<sub>4</sub><sup>2-</sup> standard curve
